# Supplementary material for: Intravenous Ibuprofen for Treatment of Post-Operative Pain: A Multicenter, Double Blind, Placebo-Controlled, Randomized Clinical Trial
Source: PLOS journal article supplement (doi:10.1371/journal.pone.0154004), 2016-05-06
Supplement: S3 (10.1371/journal.pone.0154004.s003) [file journal.pone.0154004.s003]

**S1 Table A. Serious Adverse Events**

| Study treatment        | Adverse Event         | MedDRA Preferred Term       | NCI-CTCAE grade | Outcome  | Action Taken             |
|------------------------|-----------------------|-----------------------------|-----------------|----------|--------------------------|
| Ibuprofen <sup>a</sup> | Severe induration     | Injection site induration   | 3               | Resolved | None                     |
| Ibuprofen <sup>a</sup> | Respiratory infection | Respiratory tract infection | 3               | Resolved | None                     |
| Placebo <sup>b</sup>   | Headache              | Headache                    | 3               | Resolved | Permanently discontinued |

Safety Population. All events were catalogued as unrelated to the study as regards to causality. <sup>a</sup> patient from abdominal surgery; <sup>b</sup> patient from orthopaedic surgery.
