# Supplementary material for: Intravenous Ibuprofen for Treatment of Post-Operative Pain: A Multicenter, Double Blind, Placebo-Controlled, Randomized Clinical Trial
Source: PLOS journal article supplement (doi:10.1371/journal.pone.0154004), 2016-05-06
Supplement: S5 (10.1371/journal.pone.0154004.s005) [file journal.pone.0154004.s005]

**S3 Table C. Summary of local reactions**

|                   | <b>Ibuprofen <sup>a</sup></b><br><b>(n=107)</b> | <b>Placebo <sup>b</sup></b><br><b>(n=99)</b> | <b>P Value Test</b> |
|-------------------|-------------------------------------------------|----------------------------------------------|---------------------|
| <b>Pain</b>       |                                                 |                                              |                     |
| n (%)             | 63 (58.88)                                      | 51 (51.52)                                   | Fisher: 0.3122      |
| <b>Burning</b>    |                                                 |                                              |                     |
| n (%)             | 64 (59.81)                                      | 51 (51.52)                                   | Fisher: 0.2472      |
| <b>Erythema</b>   |                                                 |                                              |                     |
| n (%)             | 3 (2.80)                                        | 3 (3.03)                                     | Fisher: 1.0000      |
| <b>Induration</b> |                                                 |                                              |                     |
| n (%)             | 3 (2.80)                                        | 0 (0.00)                                     | Fisher: 0.2471      |

Local reactions reported at any time point during the study period (safety population).

Patients that did not report these data are shown as Missing data from: <sup>a</sup> 5 patients,

<sup>b</sup> 4 patients.
